# Supplementary material for: Unique and overlapping GLI1 and GLI2 transcriptional targets in neoplastic chondrocytes
Source: PubMed Central journal article supplement (PMC6350985; doi:10.1371/journal.pone.0211333), 2019-01-29
Supplement: pone.0211333.s004.pdf [file pone.0211333.s004.pdf]

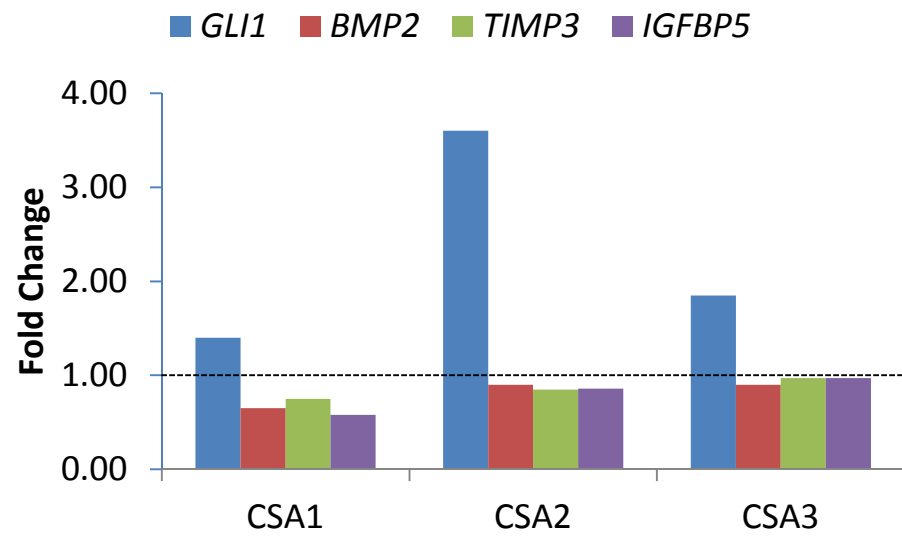

Supplementary Figure S4
